# Supplementary material for: Density functional theory study of thermodynamic and kinetic isotope effects of H2/D2 dissociative adsorption on transition metals
Source: Royal Society of Chemistry journal article supplement (doi:10.1039/c8cy00878g), 2018-01-01
Supplement: c8cy00878g1.pdf [file c8cy00878g1.pdf]

## Supplementary Information

for

### Density Functional Theory Study of Thermodynamic and Kinetic Isotope Effects of H<sub>2</sub>/D<sub>2</sub> Dissociative Adsorption on Transition Metals

Yunhai Bai<sup>+</sup>, Benjamin W. J. Chen<sup>+</sup>, Guowen Peng, Manos Mavrikakis\*

*Department of Chemical and Biological Engineering, University of Wisconsin – Madison,  
Madison, WI 53706*

<sup>+</sup> = contributed equally to this work

\*corresponding author [emavrikakis@wisc.edu](mailto:emavrikakis@wisc.edu)

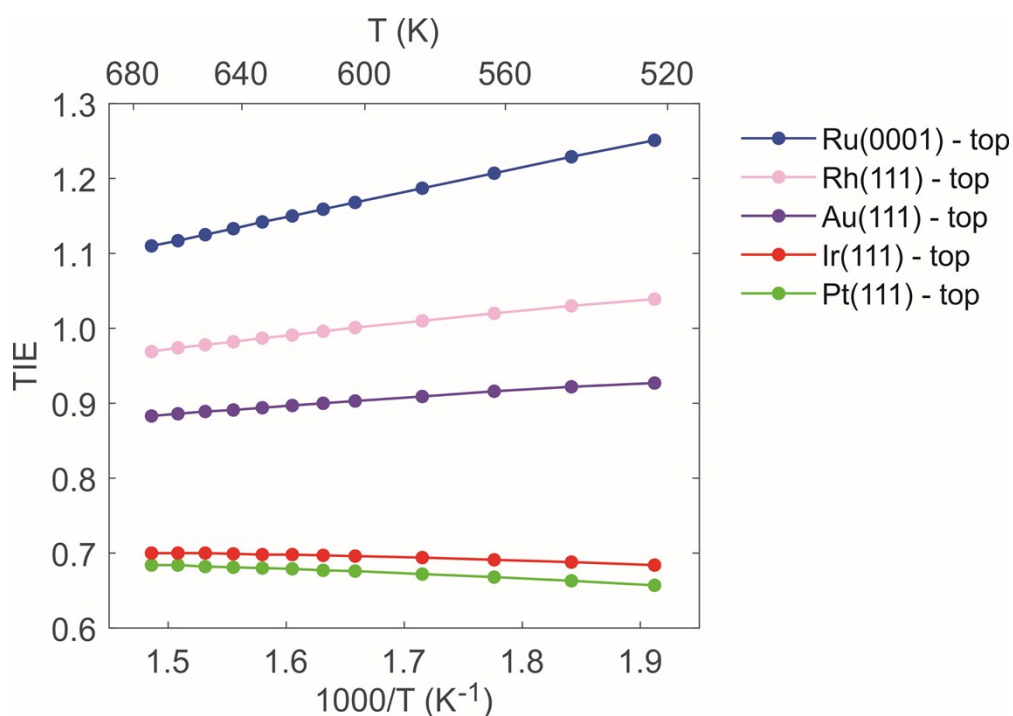

**Figure S1.** Arrhenius plots for the thermodynamic isotope effects of H<sub>2</sub> and D<sub>2</sub> dissociative adsorption on the stable top sites of close-packed surfaces of transition metals.

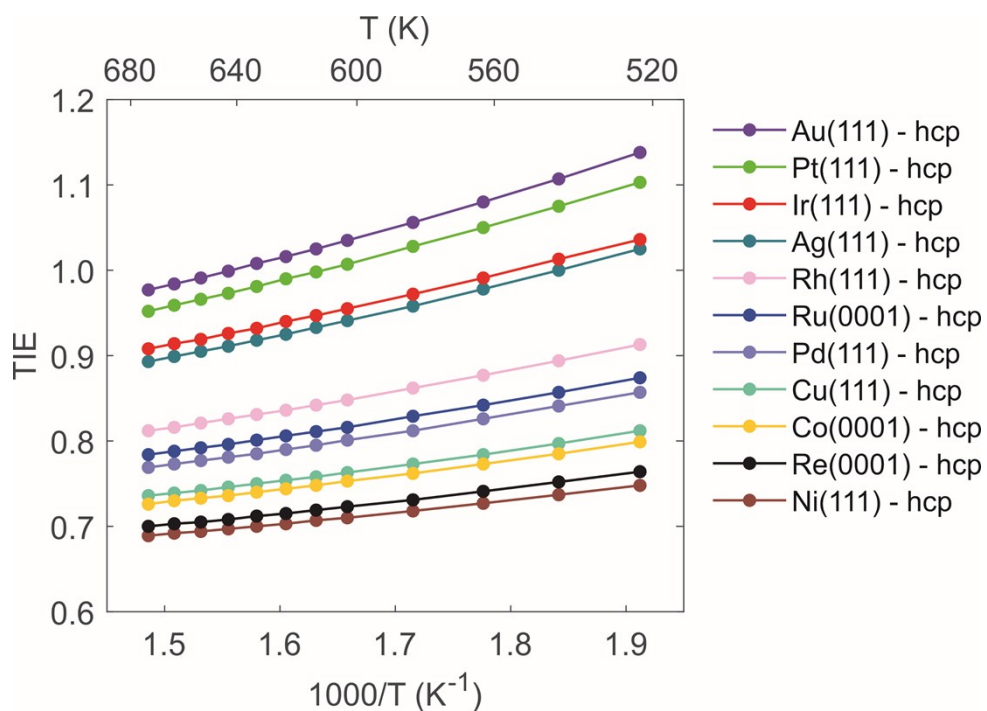

**Figure S2.** Arrhenius plots for the thermodynamic isotope effects of  $\text{H}_2$  and  $\text{D}_2$  dissociative adsorption on the stable hcp sites of close-packed surfaces of transition metals.

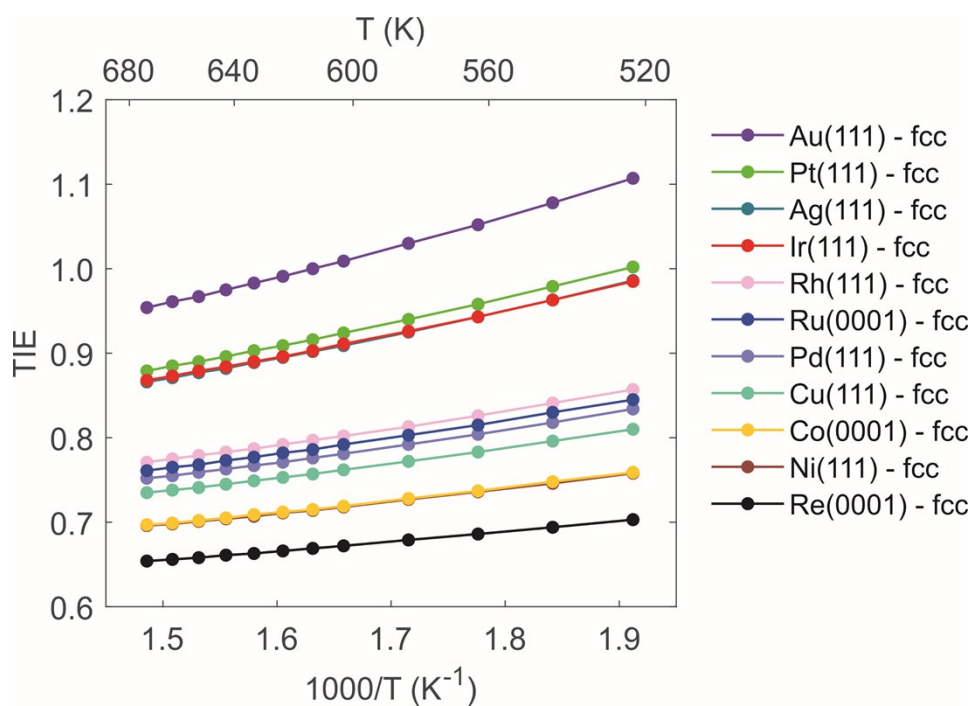

**Figure S3.** Arrhenius plots for the thermodynamic isotope effects of  $\text{H}_2$  and  $\text{D}_2$  dissociative adsorption on the stable fcc sites of close-packed surfaces of transition metals.

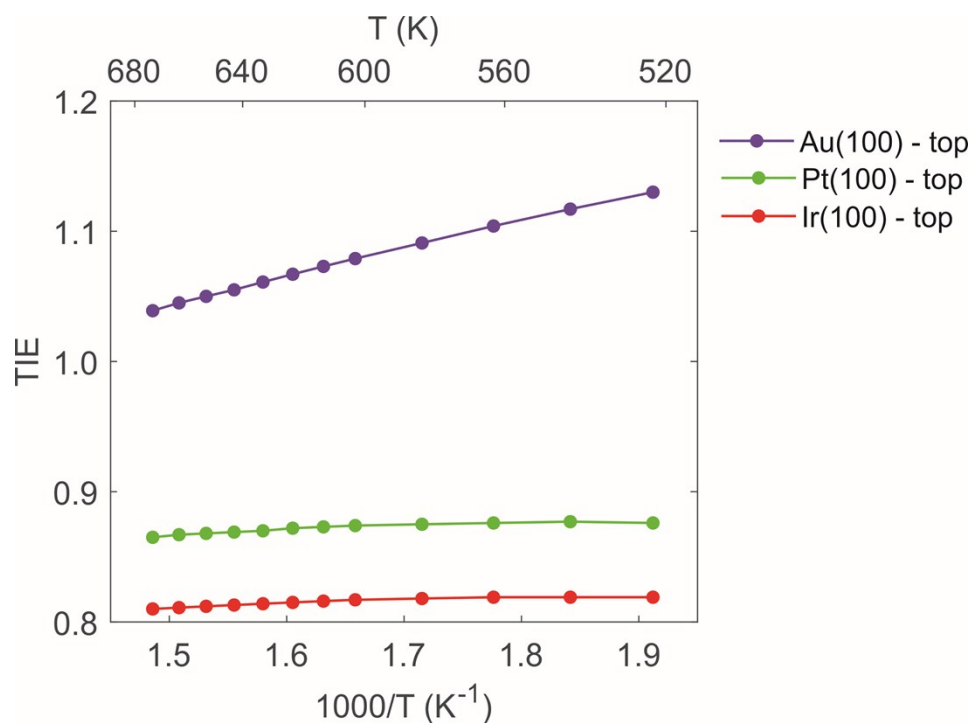

**Figure S4.** Arrhenius plots for the thermodynamic isotope effects of  $\text{H}_2$  and  $\text{D}_2$  dissociative adsorption on the stable top sites of (100) surfaces of transition metals.

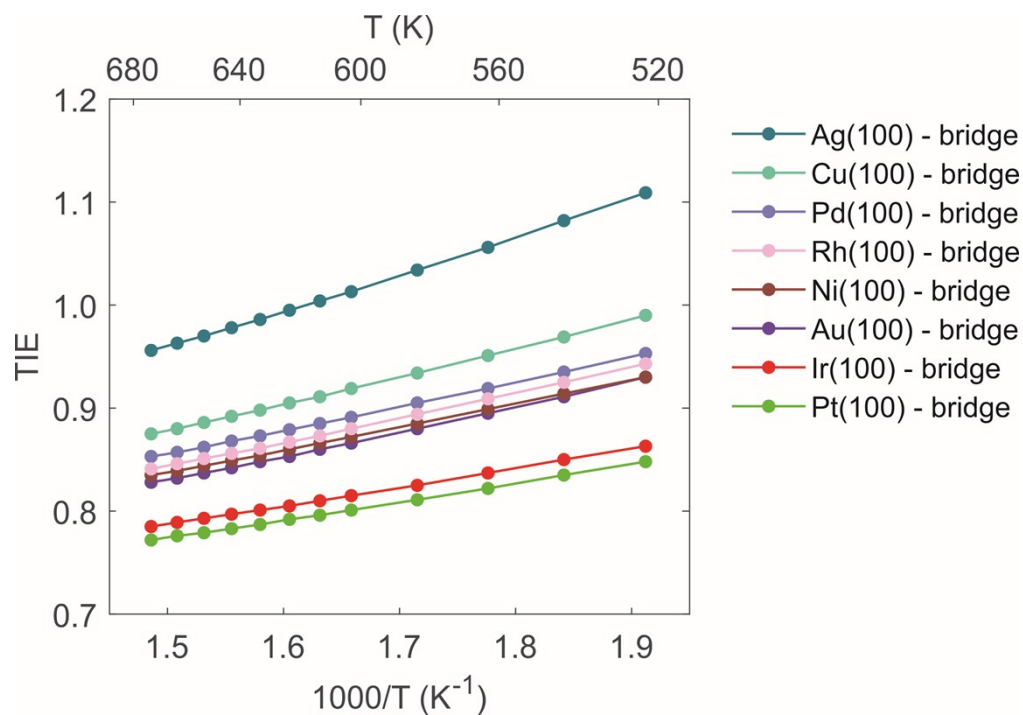

**Figure S5.** Arrhenius plots for the thermodynamic isotope effects of  $\text{H}_2$  and  $\text{D}_2$  dissociative adsorption on the stable bridge sites of (100) surfaces of transition metals.

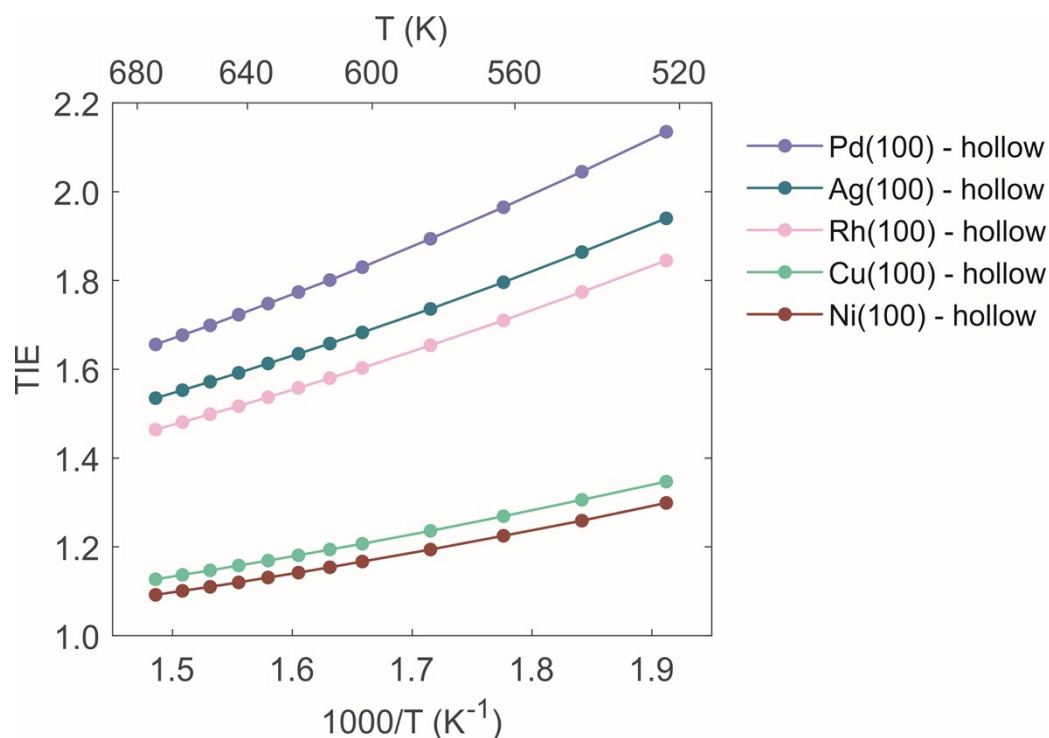

**Figure S6.** Arrhenius plots for the thermodynamic isotope effects of H<sub>2</sub> and D<sub>2</sub> dissociative adsorption on the stable hollow sites of (100) surfaces of transition metals.

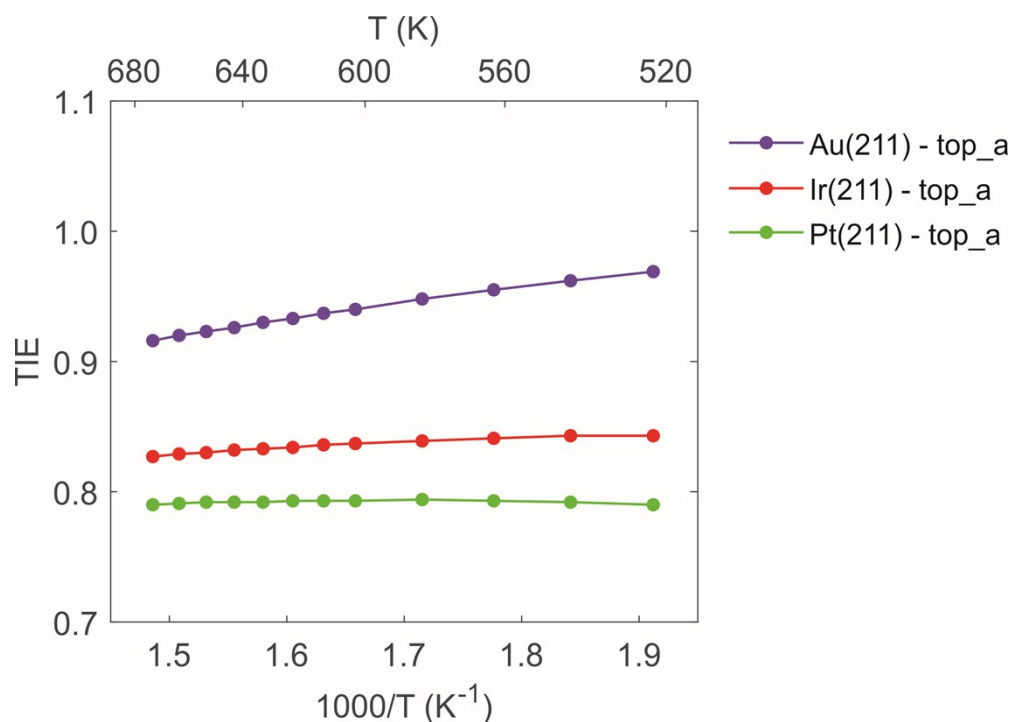

**Figure S7.** Arrhenius plots for the thermodynamic isotope effects of H<sub>2</sub> and D<sub>2</sub> dissociative adsorption on the stable top<sub>a</sub> sites of (211) surfaces of transition metals.

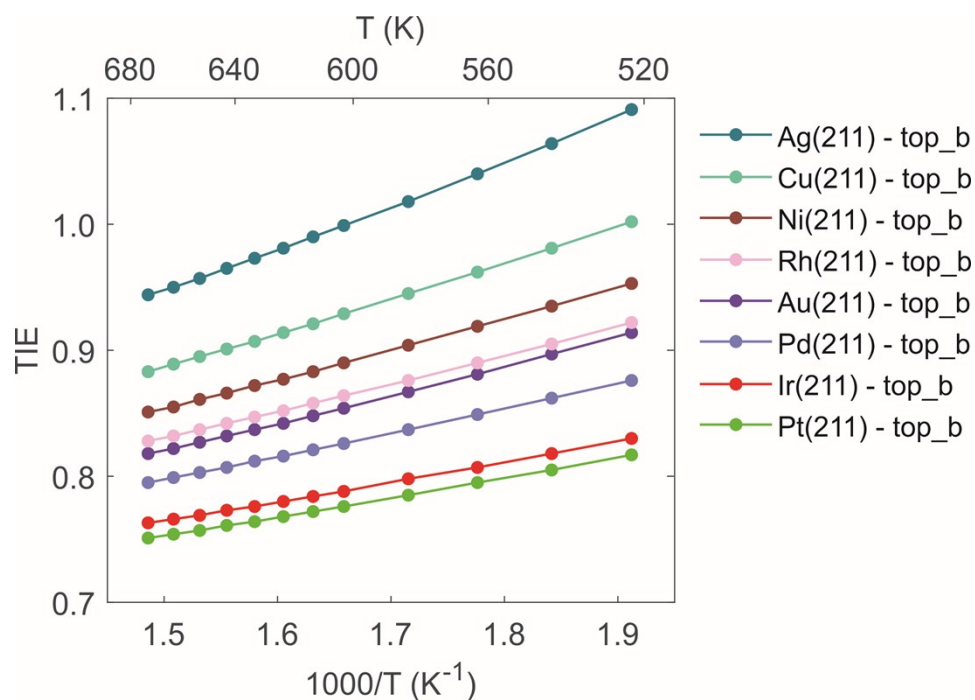

**Figure S8.** Arrhenius plots for the thermodynamic isotope effects of  $\text{H}_2$  and  $\text{D}_2$  dissociative adsorption on the stable top\_b sites of (211) surfaces of transition metals.

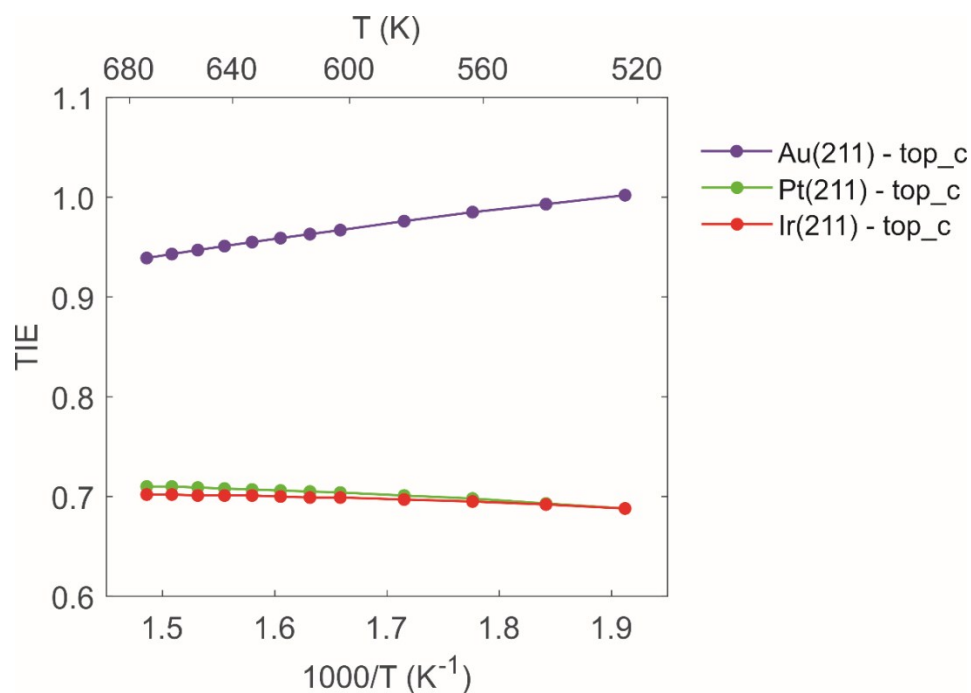

**Figure S9.** Arrhenius plots for the thermodynamic isotope effects of  $\text{H}_2$  and  $\text{D}_2$  dissociative adsorption on the stable top\_c sites of (211) surfaces of transition metals.

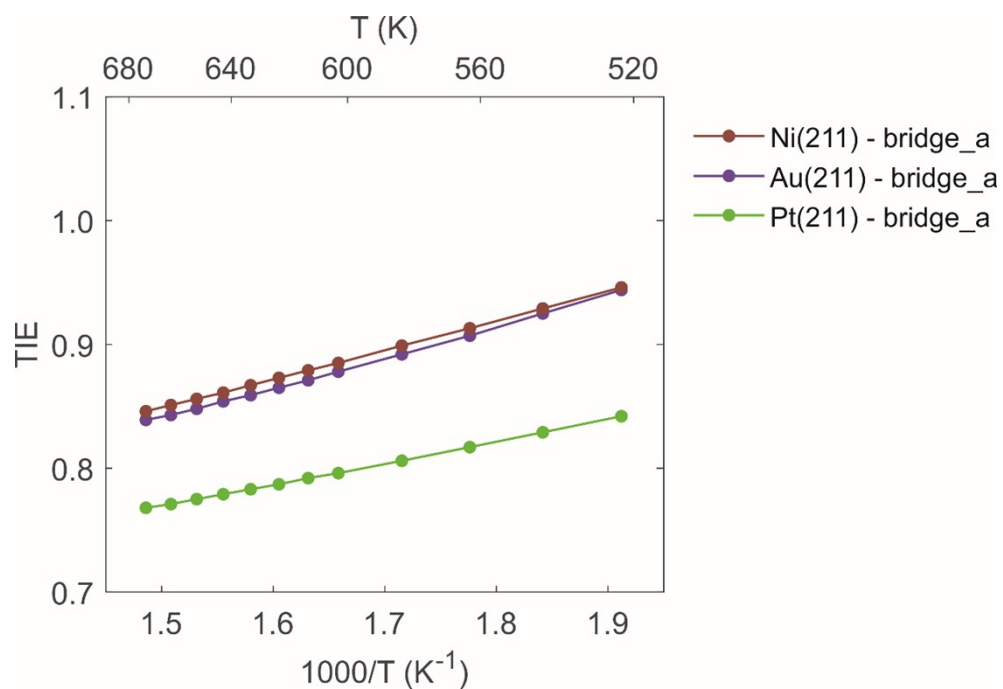

**Figure S10.** Arrhenius plots for the thermodynamic isotope effects of H<sub>2</sub> and D<sub>2</sub> dissociative adsorption on the stable bridge\_a sites of (211) surfaces of transition metals.

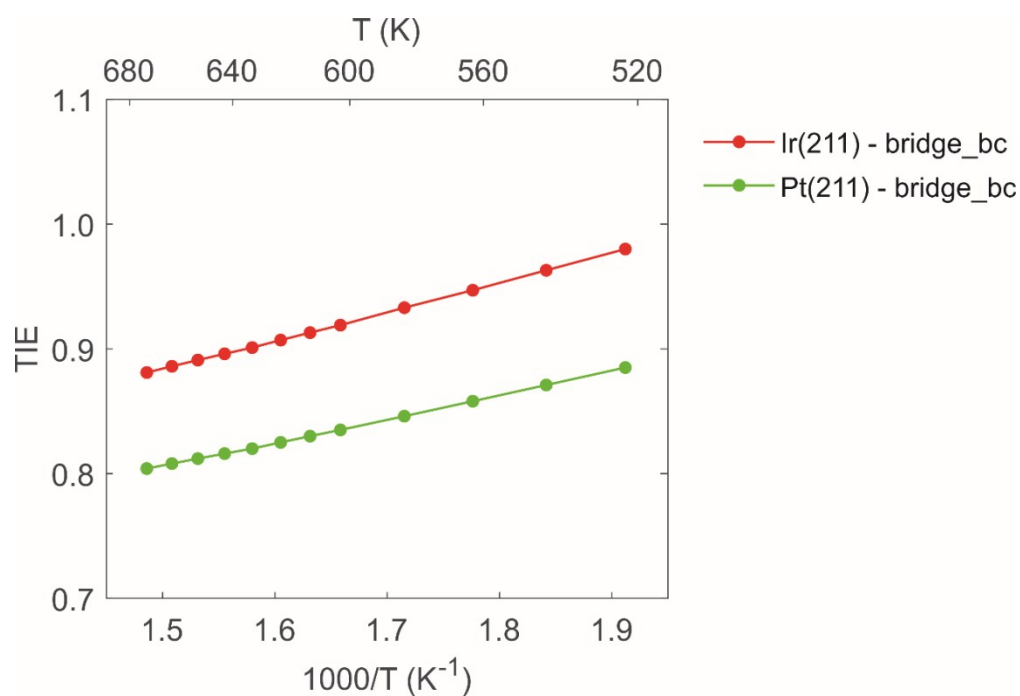

**Figure S11.** Arrhenius plots for the thermodynamic isotope effects of H<sub>2</sub> and D<sub>2</sub> dissociative adsorption on the stable bridge\_bc sites of (211) surfaces of transition metals.

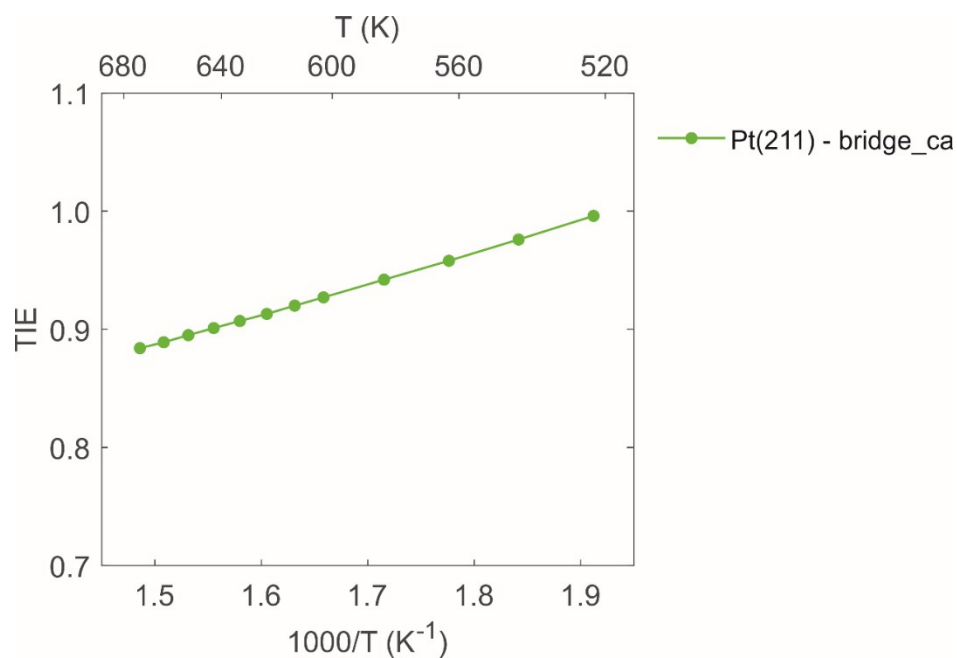

**Figure S12.** Arrhenius plots for the thermodynamic isotope effects of  $H_2$  and  $D_2$  dissociative adsorption on the stable bridge\_ca sites of (211) surfaces of transition metals.

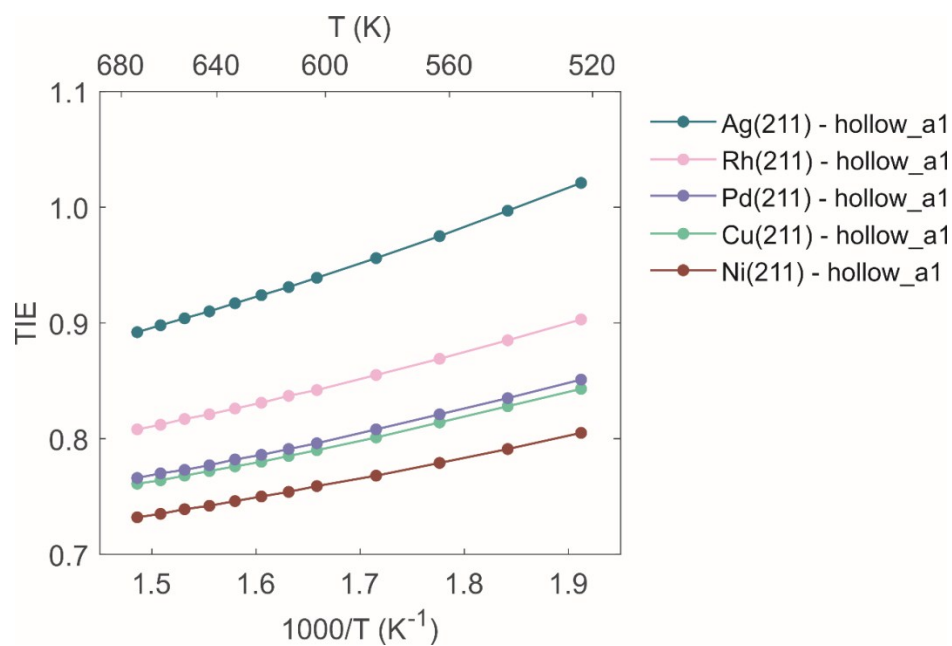

**Figure S13.** Arrhenius plots for the thermodynamic isotope effects of  $H_2$  and  $D_2$  dissociative adsorption on the stable hollow\_a1 sites of (211) surfaces of transition metals.

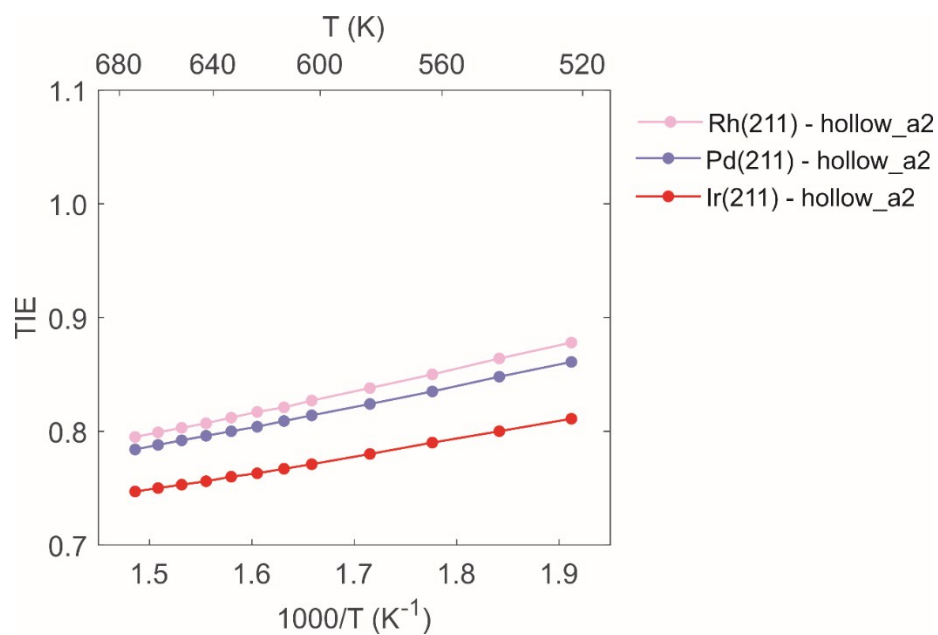

**Figure S14.** Arrhenius plots for the thermodynamic isotope effects of H<sub>2</sub> and D<sub>2</sub> dissociative adsorption on the stable hollow<sub>a2</sub> sites of (211) surfaces of transition metals.

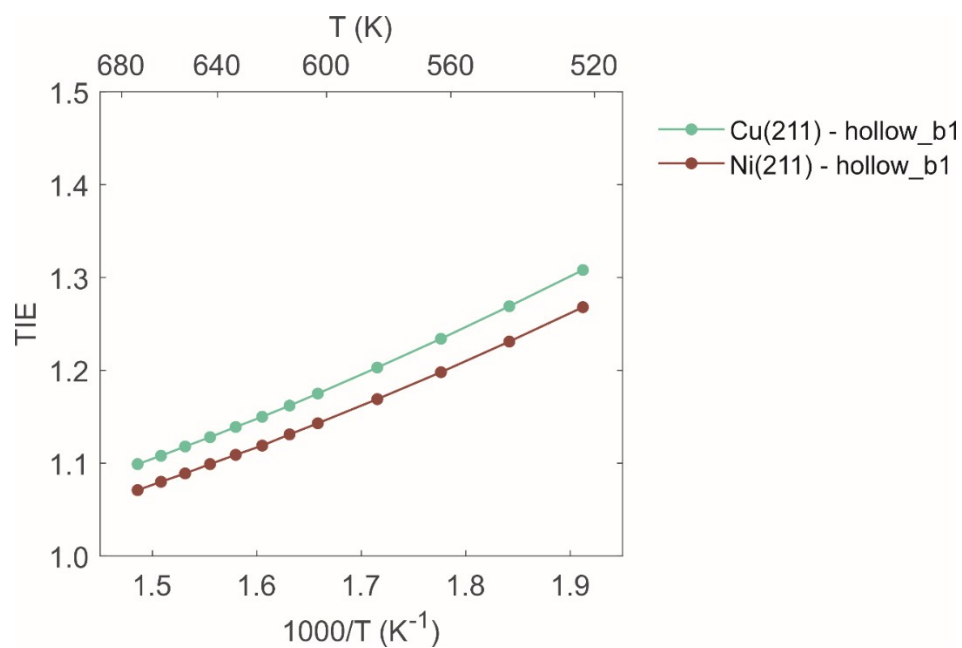

**Figure S15.** Arrhenius plots for the thermodynamic isotope effects of H<sub>2</sub> and D<sub>2</sub> dissociative adsorption on the stable hollow<sub>b1</sub> sites of (211) surfaces of transition metals.

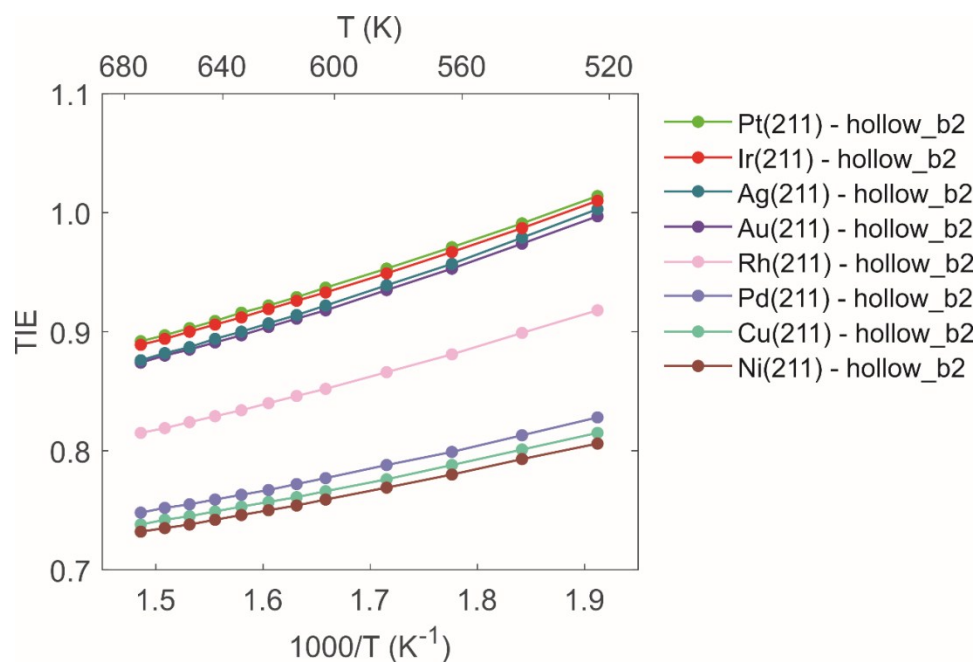

**Figure S16.** Arrhenius plots for the thermodynamic isotope effects of  $\text{H}_2$  and  $\text{D}_2$  dissociative adsorption on the stable hollow\_b2 sites of (211) surfaces of transition metals.

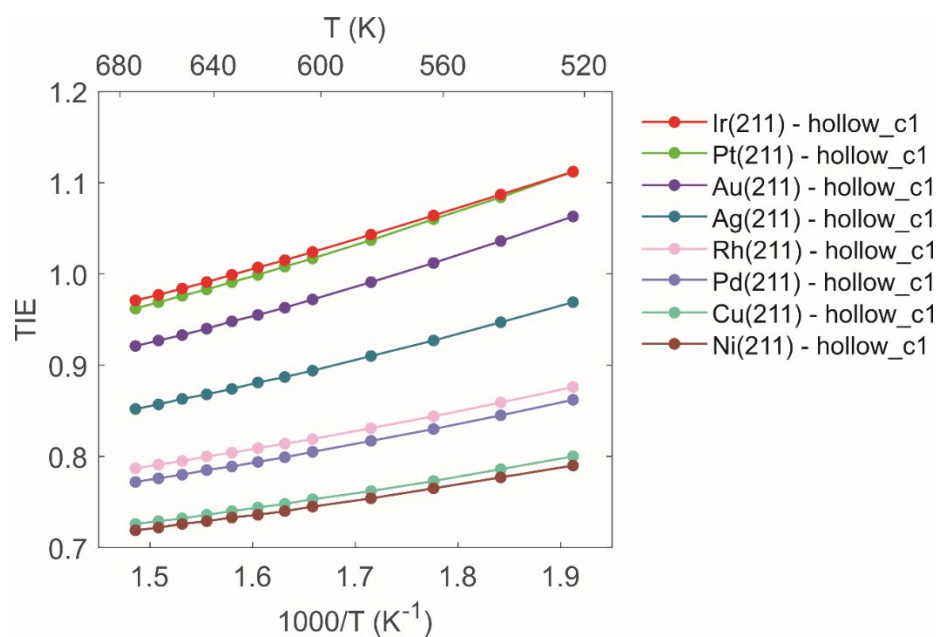

**Figure S17.** Arrhenius plots for the thermodynamic isotope effects of  $\text{H}_2$  and  $\text{D}_2$  dissociative adsorption on the stable hollow\_c1 sites of (211) surfaces of transition metals.

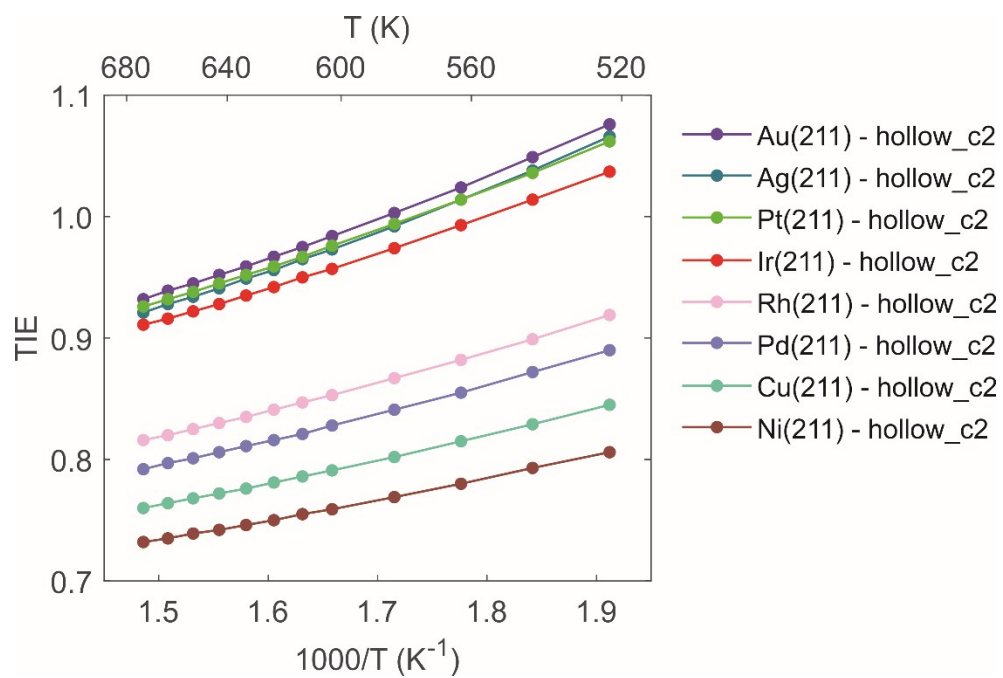

**Figure S18.** Arrhenius plots for the thermodynamic isotope effects of  $\text{H}_2$  and  $\text{D}_2$  dissociative adsorption on the stable hollow\_c2 sites of (211) surfaces of transition metals.
